# Supplementary material for: Comparative RNA-seq analysis of resistant and susceptible banana genotypes reveals molecular mechanisms in response to banana bunchy top virus (BBTV) infection
Source: PubMed Central journal article supplement (PMC10618458; doi:10.1038/s41598-023-45937-z), 2023-10-31
Supplement: 41598_2023_45937_MOESM1_ESM.pdf [file 41598_2023_45937_MOESM1_ESM.pdf]

## Comparative RNA-seq analysis of resistant and susceptible banana genotypes reveals molecular mechanisms in response to *Banana bunchy top virus* (BBTV) infection

Darlon V. Lantican, Jen Daine L. Nocum, Anand Noel C. Manohar, Jay-Vee S. Mendoza, Roanne R. Gardoce, Grace C. Lachica, Lavernee S. Gueco and Fe M. Dela Cueva

Supplementary Table S1. Statistics for raw and trimmed transcriptome reads, as well as reference-based mapping statistics, from wild *Musa balbisiana* and 'Lakatan' mock- and BBTV-inoculated samples to the *Musa acuminata* DH Pahang v2 reference genome.

| NGS reads / Mapping Statistics          | CLAK1    | CLAK2    | CLAK3    | XLAK1    | XLAK2    | XLAK3    | CMB1     | CMB2     | CMB3     | CMB3     | XMB1     | XMB2     | XMB3     |
|-----------------------------------------|----------|----------|----------|----------|----------|----------|----------|----------|----------|----------|----------|----------|----------|
| Number of spots                         | 17632235 | 27722302 | 30665733 | 20430184 | 24407252 | 17038836 | 24333650 | 11787694 | 20716804 | 20716804 | 22794698 | 15479847 | 16448751 |
| Number of paired-end reads per sample   | 35264470 | 55444604 | 61331466 | 40860368 | 48814504 | 34077672 | 48667300 | 23575388 | 41433608 | 41433608 | 45589396 | 30959694 | 32897502 |
| Average input read length               | 148      | 148      | 150      | 148      | 148      | 147      | 148      | 147      | 148      | 148      | 148      | 147      | 148      |
| Number of mapped reads                  | 16590717 | 26148659 | 29214097 | 19213971 | 22997174 | 16100944 | 22864616 | 11138840 | 19578621 | 19578621 | 21694114 | 14796256 | 15575661 |
| Mapped reads %                          | 94.09    | 94.32    | 95.27    | 94.05    | 94.22    | 94.50    | 93.96    | 94.50    | 94.51    | 94.51    | 95.17    | 95.58    | 94.69    |
| Number of uniquely mapped reads         | 8690772  | 14004833 | 13833031 | 8009272  | 12925319 | 8229585  | 12498723 | 4974044  | 10114860 | 10114860 | 9485266  | 7083483  | 7135850  |
| Uniquely mapped reads %                 | 49.29    | 50.52    | 45.11    | 39.2     | 52.96    | 48.3     | 51.36    | 42.2     | 48.82    | 48.82    | 41.61    | 45.76    | 43.38    |
| Average mapped length                   | 124.2    | 122.93   | 126.56   | 125.33   | 120.46   | 122.46   | 122.78   | 120.7    | 121.73   | 121.73   | 123.78   | 120.54   | 123.86   |
| Mismatch rate per base, %               | 3.8      | 3.84     | 3.22     | 4        | 4        | 3.87     | 3.83     | 4.46     | 4.04     | 4.04     | 4.17     | 4.29     | 4.26     |
| Deletion rate per base                  | 0.06     | 0.09     | 0.06     | 0.06     | 0.1      | 0.07     | 0.09     | 0.07     | 0.09     | 0.09     | 0.07     | 0.09     | 0.07     |
| Deletion average length                 | 2.47     | 2.64     | 2.26     | 2.29     | 2.68     | 2.48     | 2.56     | 2.46     | 2.63     | 2.63     | 2.31     | 2.55     | 2.38     |
| Insertion rate per base                 | 0.04     | 0.05     | 0.05     | 0.06     | 0.05     | 0.04     | 0.05     | 0.06     | 0.06     | 0.06     | 0.07     | 0.05     | 0.07     |
| Insertion average length                | 2.59     | 2.66     | 2.94     | 2.68     | 2.69     | 2.42     | 2.68     | 2.26     | 2.75     | 2.75     | 2.67     | 2.54     | 2.67     |
| Number of reads mapped to multiple loci | 7899945  | 12143826 | 15381066 | 11204699 | 10071855 | 7871359  | 10365893 | 6164796  | 9463761  | 9463761  | 12208848 | 7712773  | 8439811  |
| % of reads mapped to multiple loci      | 44.8     | 43.81    | 50.16    | 54.84    | 41.27    | 46.2     | 42.6     | 52.3     | 45.68    | 45.68    | 53.56    | 49.82    | 51.31    |
| % of reads unmapped: too short          | 5.75     | 6.84     | 4.63     | 5.78     | 5.63     | 5.33     | 5.9      | 5.26     | 5.33     | 5.33     | 4.66     | 4.24     | 5.13     |
