# Supplementary material for: Comparative RNA-seq analysis of resistant and susceptible banana genotypes reveals molecular mechanisms in response to banana bunchy top virus (BBTV) infection
Source: PubMed Central journal article supplement (PMC10618458; doi:10.1038/s41598-023-45937-z), 2023-10-31
Supplement: 41598_2023_45937_MOESM2_ESM.pdf [file 41598_2023_45937_MOESM2_ESM.pdf]

## Comparative RNA-seq analysis of resistant and susceptible banana genotypes reveals molecular mechanisms in response to *Banana bunchy top virus* (BBTV)

Darlon V. Lantican, Jen Daine L. Nocum, Anand Noel C. Manohar, Jay-Vee S. Mendoza, Roanne R. Gardoce, Grace C. Lachica, Lavernee S. Gueco and Fe M. Dela Cueva

Supplementary Table S2. List of differentially-expressed genes between mock- and BBTV-inoculated BBTV-resistant wild *M. balbisiana* and BBTV-susceptible Lakatan.

| Genotype                  | Gene ID     | baseMean   | log2FoldChange | lfcSE      | stat       | pvalue   | padj     |
|---------------------------|-------------|------------|----------------|------------|------------|----------|----------|
| wild <i>M. balbisiana</i> | Ma01_g02150 | 64.1770764 | -4.1310949     | 0.5587927  | -7.3928934 | 1.44E-13 | 1.24E-09 |
| wild <i>M. balbisiana</i> | Ma03_g29410 | 111.082278 | -4.5646531     | 0.66362582 | -6.8783537 | 6.05E-12 | 2.61E-08 |
| wild <i>M. balbisiana</i> | Ma06_g21680 | 199.352333 | -2.6640556     | 0.39644503 | -6.7198613 | 1.82E-11 | 5.22E-08 |
| wild <i>M. balbisiana</i> | Ma11_g07100 | 89.6108721 | -2.6708497     | 0.41614776 | -6.4180321 | 1.38E-10 | 2.97E-07 |
| wild <i>M. balbisiana</i> | Ma10_g20080 | 56.2446043 | -4.9641309     | 0.78239901 | -6.3447562 | 2.23E-10 | 3.83E-07 |
| wild <i>M. balbisiana</i> | Ma07_g20820 | 144.536172 | -3.2338113     | 0.51765189 | -6.2470773 | 4.18E-10 | 5.60E-07 |
| wild <i>M. balbisiana</i> | Ma09_g27880 | 42.3813689 | 3.4378111      | 0.55149569 | 6.23361373 | 4.56E-10 | 5.60E-07 |
| wild <i>M. balbisiana</i> | Ma06_g12350 | 59.8285923 | 3.43367038     | 0.55987849 | 6.132885   | 8.63E-10 | 9.28E-07 |
| wild <i>M. balbisiana</i> | Ma02_g08820 | 819.29753  | -2.2545341     | 0.3897269  | -5.7849075 | 7.26E-09 | 6.37E-06 |
| wild <i>M. balbisiana</i> | Ma10_g15170 | 76.9777422 | -3.5857892     | 0.62021027 | -5.7815702 | 7.40E-09 | 6.37E-06 |
| wild <i>M. balbisiana</i> | Ma11_g14200 | 30.1277579 | -4.1338625     | 0.73210412 | -5.64655   | 1.64E-08 | 1.20E-05 |
| wild <i>M. balbisiana</i> | Ma01_g01670 | 98.5147458 | -2.9739107     | 0.52828535 | -5.6293642 | 1.81E-08 | 1.20E-05 |
| wild <i>M. balbisiana</i> | Ma06_g33250 | 39.944845  | -5.4750213     | 0.97267373 | -5.6288364 | 1.81E-08 | 1.20E-05 |
| wild <i>M. balbisiana</i> | Ma05_g15310 | 39.4872802 | -3.5378061     | 0.63092088 | -5.6073688 | 2.05E-08 | 1.26E-05 |
| wild <i>M. balbisiana</i> | Ma09_g29480 | 22.0327093 | -21.857851     | 3.90885747 | -5.5918771 | 2.25E-08 | 1.29E-05 |
| wild <i>M. balbisiana</i> | Ma05_g21440 | 17.3282239 | -21.510792     | 3.90942612 | -5.5022889 | 3.75E-08 | 2.02E-05 |
| wild <i>M. balbisiana</i> | Ma10_g31030 | 78.2677871 | -2.541962      | 0.46417443 | -5.4763078 | 4.34E-08 | 2.20E-05 |
| wild <i>M. balbisiana</i> | Ma04_g31330 | 176.30014  | -2.3641732     | 0.43937834 | -5.3807231 | 7.42E-08 | 3.55E-05 |
| wild <i>M. balbisiana</i> | Ma01_g22550 | 70.9982339 | -3.2460957     | 0.60793163 | -5.3395736 | 9.32E-08 | 4.02E-05 |
| wild <i>M. balbisiana</i> | Ma10_g14160 | 49.892229  | -4.0492449     | 0.75841676 | -5.3390763 | 9.34E-08 | 4.02E-05 |
| wild <i>M. balbisiana</i> | Ma10_g28290 | 31.2427358 | -4.0812311     | 0.77901766 | -5.2389456 | 1.61E-07 | 6.62E-05 |
| wild <i>M. balbisiana</i> | Ma04_g25580 | 76.5153875 | -3.2721869     | 0.62768324 | -5.2131182 | 1.86E-07 | 7.26E-05 |
| wild <i>M. balbisiana</i> | Ma01_g07220 | 64.3146045 | -3.1999113     | 0.6178825  | -5.1788347 | 2.23E-07 | 8.23E-05 |

**Comparative RNA-seq analysis of resistant and susceptible banana genotypes reveals molecular mechanisms in response to *Banana bunchy top virus* (BBTV)**

Darlon V. Lantican, Jen Daine L. Nocum, Anand Noel C. Manohar, Jay-Vee S. Mendoza, Roanne R. Gardoce, Grace C. Lachica, Lavernee S. Gueco and Fe M. Dela Cueva

Supplementary Table S2. List of differentially-expressed genes between mock- and BBTV-inoculated BBTV-resistant wild *M. balbisiana* and BBTV-susceptible Lakatan.

|                           |             |            |            |            |            |          |            |
|---------------------------|-------------|------------|------------|------------|------------|----------|------------|
| wild <i>M. balbisiana</i> | Ma02_g21520 | 26.5109289 | -4.2972326 | 0.83059177 | -5.1736999 | 2.30E-07 | 8.23E-05   |
| wild <i>M. balbisiana</i> | Ma07_g18310 | 827.689425 | -3.2509965 | 0.63034832 | -5.1574604 | 2.50E-07 | 8.62E-05   |
| wild <i>M. balbisiana</i> | Ma08_g10850 | 36.1365998 | -4.1093409 | 0.79998499 | -5.1367725 | 2.79E-07 | 9.25E-05   |
| wild <i>M. balbisiana</i> | Ma09_g08490 | 53.8189693 | -3.9256685 | 0.77438269 | -5.0694166 | 3.99E-07 | 0.0001272  |
| wild <i>M. balbisiana</i> | Ma08_g23810 | 53.8020724 | -2.7258564 | 0.53869215 | -5.0601376 | 4.19E-07 | 0.00012878 |
| wild <i>M. balbisiana</i> | Ma08_g10940 | 70.1766516 | -4.1101058 | 0.8170393  | -5.0304873 | 4.89E-07 | 0.0001452  |
| wild <i>M. balbisiana</i> | Ma04_g33860 | 33.8542468 | -3.1191132 | 0.62117068 | -5.0213464 | 5.13E-07 | 0.00014721 |
| wild <i>M. balbisiana</i> | Ma04_g16680 | 73.5285824 | -2.8421081 | 0.56802269 | -5.0035115 | 5.63E-07 | 0.0001563  |
| wild <i>M. balbisiana</i> | Ma11_g00800 | 141.281267 | -2.0046353 | 0.40700369 | -4.9253493 | 8.42E-07 | 0.00022646 |
| wild <i>M. balbisiana</i> | Ma05_g03580 | 49.1784943 | -3.7388147 | 0.76002009 | -4.919363  | 8.68E-07 | 0.00022646 |
| wild <i>M. balbisiana</i> | Ma05_g27420 | 118.27708  | 2.57582667 | 0.52428384 | 4.91303843 | 8.97E-07 | 0.00022701 |
| wild <i>M. balbisiana</i> | Ma07_g21230 | 109.742042 | -2.0474737 | 0.4188265  | -4.8885964 | 1.02E-06 | 0.00024974 |
| wild <i>M. balbisiana</i> | Ma07_g26010 | 56.1453861 | -2.2425096 | 0.46536984 | -4.8187687 | 1.44E-06 | 0.00034535 |
| wild <i>M. balbisiana</i> | Ma02_g24860 | 39.879426  | -2.7545801 | 0.58251409 | -4.7287785 | 2.26E-06 | 0.00052543 |
| wild <i>M. balbisiana</i> | Ma02_g23730 | 49.2495896 | 2.46017154 | 0.5308237  | 4.63463014 | 3.58E-06 | 0.00080991 |
| wild <i>M. balbisiana</i> | Ma10_g05590 | 63.8004874 | -3.2769503 | 0.70806165 | -4.6280579 | 3.69E-06 | 0.0008146  |
| wild <i>M. balbisiana</i> | Ma08_g25160 | 230.870646 | -1.7484528 | 0.37884808 | -4.6151818 | 3.93E-06 | 0.0008451  |
| wild <i>M. balbisiana</i> | Ma08_g07100 | 42.1019694 | 2.6618468  | 0.58241341 | 4.57037346 | 4.87E-06 | 0.00099644 |
| wild <i>M. balbisiana</i> | Ma06_g36160 | 33.7488101 | -2.4804897 | 0.54327808 | -4.5657828 | 4.98E-06 | 0.00099644 |
| wild <i>M. balbisiana</i> | Ma05_g06140 | 30.5364535 | -5.8113408 | 1.27282417 | -4.5657059 | 4.98E-06 | 0.00099644 |
| wild <i>M. balbisiana</i> | Ma04_g00790 | 105.578302 | -1.7886367 | 0.39250021 | -4.5570338 | 5.19E-06 | 0.00101486 |
| wild <i>M. balbisiana</i> | Ma06_g35530 | 102.477384 | 2.86424716 | 0.62973199 | 4.54835901 | 5.41E-06 | 0.0010341  |
| wild <i>M. balbisiana</i> | Ma03_g11730 | 210.402189 | -3.0897778 | 0.68072503 | -4.5389514 | 5.65E-06 | 0.00105781 |
| wild <i>M. balbisiana</i> | Ma11_g01360 | 16.7793319 | -5.5002992 | 1.21871728 | -4.5131871 | 6.39E-06 | 0.00116679 |

**Comparative RNA-seq analysis of resistant and susceptible banana genotypes reveals molecular mechanisms in response to *Banana bunchy top virus* (BBTV)**

*Darlon V. Lantican, Jen Daine L. Nocum, Anand Noel C. Manohar, Jay-Vee S. Mendoza, Roanne R. Gardoce, Grace C. Lachica, Lavernee S. Gueco and Fe M. Dela Cueva*

Supplementary Table S2. List of differentially-expressed genes between mock- and BBTV-inoculated BBTV-resistant wild *M. balbisiana* and BBTV-susceptible Lakatan.

|                           |             |            |            |            |            |          |            |
|---------------------------|-------------|------------|------------|------------|------------|----------|------------|
| wild <i>M. balbisiana</i> | Ma04_g18850 | 33.2707132 | -2.4548463 | 0.54472337 | -4.5065925 | 6.59E-06 | 0.00116679 |
| wild <i>M. balbisiana</i> | Ma04_g21660 | 52.1684476 | -2.8862009 | 0.64069016 | -4.504831  | 6.64E-06 | 0.00116679 |
| wild <i>M. balbisiana</i> | Ma06_g23640 | 89.9505546 | 2.19284619 | 0.49049908 | 4.47064287 | 7.80E-06 | 0.00134243 |
| wild <i>M. balbisiana</i> | Ma04_g21890 | 55.3285096 | -2.5858258 | 0.58209357 | -4.4422855 | 8.90E-06 | 0.00150215 |
| wild <i>M. balbisiana</i> | Ma09_g14900 | 287.820123 | -3.2286578 | 0.7281954  | -4.4337795 | 9.26E-06 | 0.00153263 |
| wild <i>M. balbisiana</i> | Ma07_g23140 | 38.7611579 | -2.9731604 | 0.67186295 | -4.4252484 | 9.63E-06 | 0.00155048 |
| wild <i>M. balbisiana</i> | Ma03_g20940 | 44.8992784 | -2.2643135 | 0.51192447 | -4.4231398 | 9.73E-06 | 0.00155048 |
| wild <i>M. balbisiana</i> | Ma11_g20650 | 451.150817 | -1.6752872 | 0.38165082 | -4.389581  | 1.14E-05 | 0.00173473 |
| wild <i>M. balbisiana</i> | Ma03_g15660 | 262.150251 | 2.89001848 | 0.65851451 | 4.38869372 | 1.14E-05 | 0.00173473 |
| wild <i>M. balbisiana</i> | Ma02_g08850 | 95.6792166 | -2.8612435 | 0.65219781 | -4.3870793 | 1.15E-05 | 0.00173473 |
| wild <i>M. balbisiana</i> | Ma11_g10900 | 39.0375292 | -3.0182428 | 0.69314419 | -4.3544227 | 1.33E-05 | 0.00197988 |
| wild <i>M. balbisiana</i> | Ma01_g21040 | 8.49928277 | -6.3564906 | 1.46839777 | -4.3288615 | 1.50E-05 | 0.0021865  |
| wild <i>M. balbisiana</i> | Ma01_g09220 | 36.291323  | 2.08749301 | 0.48420727 | 4.31115585 | 1.62E-05 | 0.00232968 |
| wild <i>M. balbisiana</i> | Ma08_g26200 | 113.174847 | -2.1389973 | 0.49876528 | -4.288585  | 1.80E-05 | 0.00251333 |
| wild <i>M. balbisiana</i> | Ma07_g25830 | 18.9714656 | -3.239309  | 0.75559998 | -4.2870686 | 1.81E-05 | 0.00251333 |
| wild <i>M. balbisiana</i> | Ma03_g13370 | 52.2395279 | -2.1745563 | 0.5103544  | -4.2608751 | 2.04E-05 | 0.00272504 |
| wild <i>M. balbisiana</i> | Ma09_g09640 | 25.8886868 | -2.8446852 | 0.66784515 | -4.2594981 | 2.05E-05 | 0.00272504 |
| wild <i>M. balbisiana</i> | Ma05_g01120 | 178.805756 | -2.717496  | 0.63813321 | -4.2585091 | 2.06E-05 | 0.00272504 |
| wild <i>M. balbisiana</i> | Ma05_g15800 | 649.652084 | -2.4992907 | 0.58869126 | -4.2455034 | 2.18E-05 | 0.00284426 |
| wild <i>M. balbisiana</i> | Ma05_g07800 | 120.058889 | -2.2212467 | 0.52446068 | -4.2352969 | 2.28E-05 | 0.00293216 |
| wild <i>M. balbisiana</i> | Ma06_g31170 | 24.9154329 | 3.12343389 | 0.73961648 | 4.22304526 | 2.41E-05 | 0.00305072 |
| wild <i>M. balbisiana</i> | Ma09_g25280 | 40.3510289 | 2.88567083 | 0.6862118  | 4.20521887 | 2.61E-05 | 0.00325357 |
| wild <i>M. balbisiana</i> | Ma09_g02300 | 349.571573 | -1.6350932 | 0.38975917 | -4.1951373 | 2.73E-05 | 0.00335312 |
| wild <i>M. balbisiana</i> | Ma09_g07420 | 74.1921375 | -1.9248774 | 0.46134017 | -4.1723603 | 3.01E-05 | 0.00361111 |

**Comparative RNA-seq analysis of resistant and susceptible banana genotypes reveals molecular mechanisms in response to *Banana bunchy top virus* (BBTV)**

Darlon V. Lantican, Jen Daine L. Nocum, Anand Noel C. Manohar, Jay-Vee S. Mendoza, Roanne R. Gardoce, Grace C. Lachica, Lavernee S. Gueco and Fe M. Dela Cueva

Supplementary Table S2. List of differentially-expressed genes between mock- and BBTV-inoculated BBTV-resistant wild *M. balbisiana* and BBTV-susceptible Lakatan.

|                           |             |            |            |            |            |          |            |
|---------------------------|-------------|------------|------------|------------|------------|----------|------------|
| wild <i>M. balbisiana</i> | Ma06_g38570 | 45.6701345 | -2.2791077 | 0.54630065 | -4.1718927 | 3.02E-05 | 0.00361111 |
| wild <i>M. balbisiana</i> | Ma10_g25380 | 414.452171 | -1.6119878 | 0.39005684 | -4.1326997 | 3.59E-05 | 0.00422718 |
| wild <i>M. balbisiana</i> | Ma04_g16180 | 13.3388711 | 3.4895174  | 0.84540702 | 4.12761818 | 3.67E-05 | 0.00425085 |
| wild <i>M. balbisiana</i> | Ma09_g30860 | 272.529787 | 1.82923115 | 0.44342842 | 4.12520048 | 3.70E-05 | 0.00425085 |
| wild <i>M. balbisiana</i> | Ma04_g10370 | 20.7088766 | -2.7180339 | 0.66032643 | -4.1161973 | 3.85E-05 | 0.00432601 |
| wild <i>M. balbisiana</i> | Ma11_g19880 | 29.9356289 | -2.9723657 | 0.72230723 | -4.1150988 | 3.87E-05 | 0.00432601 |
| wild <i>M. balbisiana</i> | Ma01_g04010 | 30.6425912 | -2.4797969 | 0.60489583 | -4.0995437 | 4.14E-05 | 0.00456795 |
| wild <i>M. balbisiana</i> | Ma06_g30910 | 70.4984291 | -2.6789233 | 0.65454709 | -4.0927893 | 4.26E-05 | 0.00464359 |
| wild <i>M. balbisiana</i> | Ma04_g34180 | 613.53365  | -1.7455322 | 0.42744339 | -4.0836571 | 4.43E-05 | 0.00476962 |
| wild <i>M. balbisiana</i> | Ma00_g00510 | 15.6969935 | 3.41368818 | 0.83672719 | 4.07981026 | 4.51E-05 | 0.00478937 |
| wild <i>M. balbisiana</i> | Ma08_g23180 | 502.13989  | 3.06225702 | 0.75269211 | 4.06840588 | 4.73E-05 | 0.00496853 |
| wild <i>M. balbisiana</i> | Ma11_g09710 | 106.63203  | -6.0259106 | 1.48771907 | -4.0504358 | 5.11E-05 | 0.00530132 |
| wild <i>M. balbisiana</i> | Ma08_g21950 | 10.0441418 | -5.6160447 | 1.38862747 | -4.0443134 | 5.25E-05 | 0.00533334 |
| wild <i>M. balbisiana</i> | Ma07_g08090 | 45.9313103 | -1.9984261 | 0.49423784 | -4.0434502 | 5.27E-05 | 0.00533334 |
| wild <i>M. balbisiana</i> | Ma02_g19620 | 39.5884555 | 2.30553694 | 0.571046   | 4.03739266 | 5.40E-05 | 0.00540926 |
| wild <i>M. balbisiana</i> | Ma10_g05760 | 34.8990676 | -2.8543659 | 0.7084728  | -4.0288997 | 5.60E-05 | 0.00554395 |
| wild <i>M. balbisiana</i> | Ma09_g03430 | 31.6699673 | 2.32069302 | 0.57657743 | 4.024946   | 5.70E-05 | 0.00554998 |
| wild <i>M. balbisiana</i> | Ma04_g39130 | 43.461532  | 3.25860658 | 0.80993441 | 4.02329687 | 5.74E-05 | 0.00554998 |
| wild <i>M. balbisiana</i> | Ma03_g03480 | 76.4497645 | 3.18557853 | 0.79274477 | 4.01841632 | 5.86E-05 | 0.00560322 |
| wild <i>M. balbisiana</i> | Ma09_g30010 | 41.1111031 | 2.36487112 | 0.59052893 | 4.00466601 | 6.21E-05 | 0.00587406 |
| wild <i>M. balbisiana</i> | Ma08_g09190 | 16.2900629 | 2.90482326 | 0.72629271 | 3.99952141 | 6.35E-05 | 0.00593796 |
| wild <i>M. balbisiana</i> | Ma03_g14330 | 12.2008166 | -4.0732528 | 1.02043512 | -3.9916823 | 6.56E-05 | 0.00602534 |
| wild <i>M. balbisiana</i> | Ma01_g01110 | 7.78963856 | -6.2064346 | 1.55512105 | -3.9909656 | 6.58E-05 | 0.00602534 |
| wild <i>M. balbisiana</i> | Ma10_g11570 | 20.6425875 | -3.884626  | 0.97407875 | -3.9879999 | 6.66E-05 | 0.00603692 |

**Comparative RNA-seq analysis of resistant and susceptible banana genotypes reveals molecular mechanisms in response to *Banana bunchy top virus* (BBTV)**

Darlon V. Lantican, Jen Daine L. Nocum, Anand Noel C. Manohar, Jay-Vee S. Mendoza, Roanne R. Gardoce, Grace C. Lachica, Lavernee S. Gueco and Fe M. Dela Cueva

Supplementary Table S2. List of differentially-expressed genes between mock- and BBTV-inoculated BBTV-resistant wild *M. balbisiana* and BBTV-susceptible Lakatan.

|                           |             |            |            |            |            |            |            |
|---------------------------|-------------|------------|------------|------------|------------|------------|------------|
| wild <i>M. balbisiana</i> | Ma01_g14940 | 198.655959 | -2.0588959 | 0.51682523 | -3.9837373 | 6.78E-05   | 0.00608227 |
| wild <i>M. balbisiana</i> | Ma03_g32970 | 38.3963567 | -2.6864491 | 0.67825411 | -3.9608298 | 7.47E-05   | 0.00662737 |
| wild <i>M. balbisiana</i> | Ma04_g27510 | 56.8695415 | -3.2498724 | 0.8215975  | -3.955553  | 7.64E-05   | 0.00670624 |
| wild <i>M. balbisiana</i> | Ma09_g14720 | 91.4159316 | -2.23122   | 0.56505999 | -3.9486428 | 7.86E-05   | 0.00683305 |
| wild <i>M. balbisiana</i> | Ma06_g38530 | 11.3254158 | -4.309366  | 1.09268791 | -3.9438215 | 8.02E-05   | 0.00690224 |
| wild <i>M. balbisiana</i> | Ma07_g09610 | 213.092432 | 2.38507813 | 0.6057004  | 3.93771926 | 8.23E-05   | 0.00701    |
| wild <i>M. balbisiana</i> | Ma08_g17730 | 14.0168528 | -5.2311994 | 1.33764327 | -3.9107582 | 9.20E-05   | 0.00772278 |
| wild <i>M. balbisiana</i> | Ma09_g17760 | 108.05288  | -1.5804105 | 0.40423015 | -3.9096799 | 9.24E-05   | 0.00772278 |
| wild <i>M. balbisiana</i> | Ma03_g20340 | 78.4069792 | -2.1264058 | 0.54977103 | -3.8678026 | 0.00010982 | 0.0090887  |
| wild <i>M. balbisiana</i> | Ma03_g02450 | 39.6416239 | -2.0551895 | 0.5317608  | -3.864876  | 0.00011115 | 0.00911077 |
| wild <i>M. balbisiana</i> | Ma02_g01300 | 12.43329   | -5.0349772 | 1.31433937 | -3.8308046 | 0.00012772 | 0.01036619 |
| wild <i>M. balbisiana</i> | Ma11_g03670 | 14.4984214 | 3.89502548 | 1.01734752 | 3.82860861 | 0.00012887 | 0.01036619 |
| wild <i>M. balbisiana</i> | Ma09_g08110 | 62.7072916 | 1.99347169 | 0.52164975 | 3.82147544 | 0.00013266 | 0.01057192 |
| wild <i>M. balbisiana</i> | Ma09_g00790 | 24.7321132 | -2.7919198 | 0.73443581 | -3.8014484 | 0.00014385 | 0.01135908 |
| wild <i>M. balbisiana</i> | Ma04_g22260 | 19.8043985 | -2.4917819 | 0.65598868 | -3.7985135 | 0.00014557 | 0.01138992 |
| wild <i>M. balbisiana</i> | Ma09_g01360 | 23.0771167 | -2.3233784 | 0.61205178 | -3.7960488 | 0.00014702 | 0.01140005 |
| wild <i>M. balbisiana</i> | Ma06_g16330 | 10.4781021 | -4.2525948 | 1.12333096 | -3.7857007 | 0.00015328 | 0.01177899 |
| wild <i>M. balbisiana</i> | Ma09_g25900 | 44.8997058 | -2.4951884 | 0.65982068 | -3.781616  | 0.00015581 | 0.01186803 |
| wild <i>M. balbisiana</i> | Ma03_g03280 | 36.793316  | -3.1514676 | 0.83588876 | -3.7701997 | 0.00016312 | 0.01231533 |
| wild <i>M. balbisiana</i> | Ma11_g04550 | 68.0809333 | -1.7409975 | 0.46357934 | -3.7555546 | 0.00017296 | 0.01294478 |
| wild <i>M. balbisiana</i> | Ma08_g22450 | 28.0770203 | 2.02257164 | 0.54113637 | 3.73763757 | 0.00018576 | 0.01378288 |
| wild <i>M. balbisiana</i> | Ma04_g27610 | 625.459575 | -1.1916353 | 0.32076525 | -3.7149763 | 0.00020322 | 0.0149499  |
| wild <i>M. balbisiana</i> | Ma05_g28720 | 10.1231552 | -3.779012  | 1.02275909 | -3.694919  | 0.00021996 | 0.01593059 |
| wild <i>M. balbisiana</i> | Ma11_g02330 | 27.6486461 | -2.3361004 | 0.63230573 | -3.6945741 | 0.00022026 | 0.01593059 |

**Comparative RNA-seq analysis of resistant and susceptible banana genotypes reveals molecular mechanisms in response to *Banana bunchy top virus* (BBTV)**

*Darlon V. Lantican, Jen Daine L. Nocum, Anand Noel C. Manohar, Jay-Vee S. Mendoza, Roanne R. Gardoce, Grace C. Lachica, Lavernee S. Gueco and Fe M. Dela Cueva*

Supplementary Table S2. List of differentially-expressed genes between mock- and BBTV-inoculated BBTV-resistant wild *M. balbisiana* and BBTV-susceptible Lakatan.

|                           |             |            |            |            |            |            |            |
|---------------------------|-------------|------------|------------|------------|------------|------------|------------|
| wild <i>M. balbisiana</i> | Ma02_g05590 | 354.799881 | 1.46643183 | 0.39759485 | 3.68825664 | 0.0002258  | 0.01619521 |
| wild <i>M. balbisiana</i> | Ma04_g20350 | 39.292898  | -2.2525415 | 0.61170239 | -3.6824141 | 0.00023104 | 0.01643409 |
| wild <i>M. balbisiana</i> | Ma01_g21420 | 70.4225525 | -2.2219739 | 0.60751259 | -3.6574945 | 0.00025469 | 0.01796836 |
| wild <i>M. balbisiana</i> | Ma07_g26720 | 33.5454087 | -2.4030163 | 0.65900318 | -3.6464412 | 0.0002659  | 0.01855364 |
| wild <i>M. balbisiana</i> | Ma06_g36640 | 19.4591539 | 2.63335037 | 0.72243804 | 3.64508821 | 0.0002673  | 0.01855364 |
| wild <i>M. balbisiana</i> | Ma06_g29050 | 213.465882 | -2.5036305 | 0.68916741 | -3.6328335 | 0.00028033 | 0.01930212 |
| wild <i>M. balbisiana</i> | Ma01_g11670 | 92.3250577 | 2.38008504 | 0.65634585 | 3.62626662 | 0.00028755 | 0.0196423  |
| wild <i>M. balbisiana</i> | Ma07_g27820 | 203.742547 | -1.7257904 | 0.4763653  | -3.6228298 | 0.0002914  | 0.0197485  |
| wild <i>M. balbisiana</i> | Ma11_g02690 | 9.53965742 | -4.5480635 | 1.25817429 | -3.614812  | 0.00030057 | 0.02013255 |
| wild <i>M. balbisiana</i> | Ma03_g03930 | 2076.02076 | -1.3098166 | 0.36244862 | -3.6137994 | 0.00030174 | 0.02013255 |
| wild <i>M. balbisiana</i> | Ma10_g27530 | 9.65828424 | 4.40364073 | 1.22270368 | 3.60156005 | 0.00031631 | 0.02094238 |
| wild <i>M. balbisiana</i> | Ma10_g12100 | 20.0149746 | -4.2443968 | 1.18212066 | -3.5904937 | 0.00033005 | 0.02168518 |
| wild <i>M. balbisiana</i> | Ma06_g26470 | 41.6237231 | -2.4632525 | 0.68671176 | -3.5870253 | 0.00033447 | 0.02180909 |
| wild <i>M. balbisiana</i> | Ma06_g35790 | 27.3185106 | 2.36465376 | 0.6612774  | 3.57588776 | 0.00034904 | 0.02258796 |
| wild <i>M. balbisiana</i> | Ma03_g32890 | 74.6091634 | -1.5764659 | 0.44130515 | -3.5722807 | 0.00035389 | 0.02273056 |
| wild <i>M. balbisiana</i> | Ma07_g25320 | 99.473165  | 1.46756688 | 0.41139338 | 3.56730798 | 0.00036067 | 0.02299456 |
| wild <i>M. balbisiana</i> | Ma11_g05710 | 86.1157713 | 1.64065227 | 0.4604194  | 3.56338649 | 0.0003661  | 0.02316824 |
| wild <i>M. balbisiana</i> | Ma04_g25840 | 318.048492 | -1.8442958 | 0.51808909 | -3.5598044 | 0.00037113 | 0.02316824 |
| wild <i>M. balbisiana</i> | Ma10_g21920 | 14.9150244 | -3.135576  | 0.88088698 | -3.5595668 | 0.00037147 | 0.02316824 |
| wild <i>M. balbisiana</i> | Ma07_g15570 | 36.4201782 | -2.8503489 | 0.80180922 | -3.5548966 | 0.00037813 | 0.02329889 |
| wild <i>M. balbisiana</i> | Ma07_g24440 | 28.0301069 | -1.9606128 | 0.55167478 | -3.5539287 | 0.00037952 | 0.02329889 |
| wild <i>M. balbisiana</i> | Ma08_g28840 | 88.2592557 | 2.14813869 | 0.60469466 | 3.55243534 | 0.00038168 | 0.02329889 |
| wild <i>M. balbisiana</i> | Ma10_g18610 | 17.1384147 | 4.17228024 | 1.17692986 | 3.54505428 | 0.00039253 | 0.02379243 |
| wild <i>M. balbisiana</i> | Ma02_g24260 | 8.67715574 | 5.1368321  | 1.45109479 | 3.53997004 | 0.00040017 | 0.0240859  |

**Comparative RNA-seq analysis of resistant and susceptible banana genotypes reveals molecular mechanisms in response to *Banana bunchy top virus* (BBTV)**

*Darlon V. Lantican, Jen Daine L. Nocum, Anand Noel C. Manohar, Jay-Vee S. Mendoza, Roanne R. Gardoce, Grace C. Lachica, Lavernee S. Gueco and Fe M. Dela Cueva*

Supplementary Table S2. List of differentially-expressed genes between mock- and BBTV-inoculated BBTV-resistant wild *M. balbisiana* and BBTV-susceptible Lakatan.

|                           |             |            |            |            |            |            |            |
|---------------------------|-------------|------------|------------|------------|------------|------------|------------|
| wild <i>M. balbisiana</i> | Ma04_g31130 | 25.4621123 | -2.7516443 | 0.7778679  | -3.5374185 | 0.00040406 | 0.02415094 |
| wild <i>M. balbisiana</i> | Ma06_g33890 | 59.4444743 | -1.630077  | 0.46127909 | -3.5338194 | 0.0004096  | 0.02421702 |
| wild <i>M. balbisiana</i> | Ma03_g28040 | 30.0517658 | -3.7310934 | 1.05605393 | -3.5330519 | 0.00041079 | 0.02421702 |
| wild <i>M. balbisiana</i> | Ma08_g19890 | 216.276175 | 2.64710445 | 0.75039622 | 3.527609   | 0.00041933 | 0.02455226 |
| wild <i>M. balbisiana</i> | Ma01_g17210 | 46.6562246 | -2.1215357 | 0.60176113 | -3.5255447 | 0.00042261 | 0.02457722 |
| wild <i>M. balbisiana</i> | Ma05_g20170 | 15.9465502 | -3.4393775 | 0.9767775  | -3.5211473 | 0.00042968 | 0.02472269 |
| wild <i>M. balbisiana</i> | Ma10_g08680 | 22.626819  | -2.1543811 | 0.6119911  | -3.5202818 | 0.00043109 | 0.02472269 |
| wild <i>M. balbisiana</i> | Ma10_g18720 | 45.890082  | -2.2213774 | 0.63131336 | -3.5186605 | 0.00043373 | 0.02472269 |
| wild <i>M. balbisiana</i> | Ma08_g12490 | 9.20670336 | -3.9073249 | 1.1147741  | -3.5050374 | 0.00045654 | 0.02561057 |
| wild <i>M. balbisiana</i> | Ma04_g36890 | 10.1575451 | -3.6423261 | 1.03942002 | -3.5041908 | 0.000458   | 0.02561057 |
| wild <i>M. balbisiana</i> | Ma08_g27190 | 9.47656649 | 3.61300413 | 1.03109301 | 3.50405259 | 0.00045823 | 0.02561057 |
| wild <i>M. balbisiana</i> | Ma10_g19060 | 9.221637   | 4.10918609 | 1.17387479 | 3.50053185 | 0.00046433 | 0.02578384 |
| wild <i>M. balbisiana</i> | Ma09_g01440 | 16.6455321 | -2.8665139 | 0.82291954 | -3.4833465 | 0.00049519 | 0.02716579 |
| wild <i>M. balbisiana</i> | Ma08_g03140 | 28.2800716 | -2.0547174 | 0.5899002  | -3.483161  | 0.00049553 | 0.02716579 |
| wild <i>M. balbisiana</i> | Ma06_g36550 | 8.37580833 | -5.3218041 | 1.5296034  | -3.4792052 | 0.0005029  | 0.02737737 |
| wild <i>M. balbisiana</i> | Ma02_g15850 | 34.6370533 | -1.9625684 | 0.56433077 | -3.4776917 | 0.00050575 | 0.02737737 |
| wild <i>M. balbisiana</i> | Ma03_g30520 | 26.1027124 | 2.31719818 | 0.66710844 | 3.47349554 | 0.00051373 | 0.02763524 |
| wild <i>M. balbisiana</i> | Ma11_g22440 | 37.6668459 | -2.0045639 | 0.57743229 | -3.4715134 | 0.00051753 | 0.02766715 |
| wild <i>M. balbisiana</i> | Ma06_g31950 | 21.8733673 | -2.5529086 | 0.73600881 | -3.4685843 | 0.00052321 | 0.02779787 |
| wild <i>M. balbisiana</i> | Ma08_g25310 | 11.5042337 | -3.100656  | 0.89592162 | -3.4608563 | 0.00053846 | 0.02838944 |
| wild <i>M. balbisiana</i> | Ma07_g19450 | 20.9468685 | 2.29874506 | 0.66445031 | 3.45961923 | 0.00054094 | 0.02838944 |
| wild <i>M. balbisiana</i> | Ma08_g29650 | 10.037916  | 3.72264865 | 1.081164   | 3.4431859  | 0.0005749  | 0.02998908 |
| wild <i>M. balbisiana</i> | Ma08_g30610 | 40.6898958 | 2.09678488 | 0.60936133 | 3.44095495 | 0.00057967 | 0.03005528 |
| wild <i>M. balbisiana</i> | Ma07_g21110 | 62.3496702 | 1.94890253 | 0.56747418 | 3.43434574 | 0.00059399 | 0.0306134  |

**Comparative RNA-seq analysis of resistant and susceptible banana genotypes reveals molecular mechanisms in response to *Banana bunchy top virus* (BBTV)**

*Darlon V. Lantican, Jen Daine L. Nocum, Anand Noel C. Manohar, Jay-Vee S. Mendoza, Roanne R. Gardoce, Grace C. Lachica, Lavernee S. Gueco and Fe M. Dela Cueva*

Supplementary Table S2. List of differentially-expressed genes between mock- and BBTV-inoculated BBTV-resistant wild *M. balbisiana* and BBTV-susceptible Lakatan.

|                           |             |            |            |            |            |            |            |
|---------------------------|-------------|------------|------------|------------|------------|------------|------------|
| wild <i>M. balbisiana</i> | Ma03_g23180 | 15.1183053 | 2.36423517 | 0.68988988 | 3.42697473 | 0.00061035 | 0.03126933 |
| wild <i>M. balbisiana</i> | Ma06_g27370 | 62.0079409 | -1.9839679 | 0.58019636 | -3.4194766 | 0.00062742 | 0.03195373 |
| wild <i>M. balbisiana</i> | Ma07_g20780 | 20.9436239 | -2.0325944 | 0.59470397 | -3.4178255 | 0.00063124 | 0.03195909 |
| wild <i>M. balbisiana</i> | Ma09_g07910 | 40.7608572 | -2.2998732 | 0.67434054 | -3.4105516 | 0.00064832 | 0.03249105 |
| wild <i>M. balbisiana</i> | Ma11_g00670 | 7.81607723 | -4.4244272 | 1.29743225 | -3.4101412 | 0.00064929 | 0.03249105 |
| wild <i>M. balbisiana</i> | Ma04_g06710 | 47.7859201 | -1.5246264 | 0.44780205 | -3.4046883 | 0.0006624  | 0.03295516 |
| wild <i>M. balbisiana</i> | Ma06_g38760 | 181.77071  | -1.5111908 | 0.44575121 | -3.3902113 | 0.00069839 | 0.0345461  |
| wild <i>M. balbisiana</i> | Ma06_g18390 | 21.9475451 | 2.14234514 | 0.63244012 | 3.38742765 | 0.00070551 | 0.03469916 |
| wild <i>M. balbisiana</i> | Ma09_g06720 | 47.1050936 | -2.637233  | 0.77952571 | -3.383125  | 0.00071666 | 0.03504711 |
| wild <i>M. balbisiana</i> | Ma11_g00040 | 26.8934197 | 2.24937216 | 0.66530563 | 3.38096064 | 0.00072233 | 0.03512477 |
| wild <i>M. balbisiana</i> | Ma04_g37990 | 84.5336243 | -1.3219264 | 0.39186619 | -3.3734127 | 0.00074243 | 0.0358992  |
| wild <i>M. balbisiana</i> | Ma07_g23960 | 23.4824172 | -3.7392445 | 1.10952204 | -3.3701399 | 0.0007513  | 0.03612537 |
| wild <i>M. balbisiana</i> | Ma01_g15060 | 325.910359 | 2.11298843 | 0.62764219 | 3.36654938 | 0.00076115 | 0.03635634 |
| wild <i>M. balbisiana</i> | Ma08_g05190 | 94.0023594 | -2.0502006 | 0.60921431 | -3.3653191 | 0.00076455 | 0.03635634 |
| wild <i>M. balbisiana</i> | Ma10_g17310 | 115.30493  | -1.5313779 | 0.45546508 | -3.3622289 | 0.00077316 | 0.03656367 |
| wild <i>M. balbisiana</i> | Ma04_g22180 | 15.1227785 | 2.53078068 | 0.75356644 | 3.35840419 | 0.00078394 | 0.03687083 |
| wild <i>M. balbisiana</i> | Ma09_g05450 | 15.9820473 | -2.8462548 | 0.85012007 | -3.3480621 | 0.00081379 | 0.03806669 |
| wild <i>M. balbisiana</i> | Ma10_g09050 | 98.6780892 | 2.58498492 | 0.77414824 | 3.33913427 | 0.0008404  | 0.03909901 |
| wild <i>M. balbisiana</i> | Ma10_g26800 | 240.684886 | -1.5744175 | 0.47207809 | -3.3350786 | 0.00085275 | 0.0394133  |
| wild <i>M. balbisiana</i> | Ma10_g15380 | 19.3412662 | 2.87198029 | 0.86144251 | 3.33391987 | 0.00085631 | 0.0394133  |
| wild <i>M. balbisiana</i> | Ma03_g32450 | 76.0119869 | -1.6796415 | 0.50453942 | -3.3290589 | 0.0008714  | 0.03989435 |
| wild <i>M. balbisiana</i> | Ma09_g20540 | 10.028864  | -3.4125225 | 1.02820661 | -3.3189074 | 0.0009037  | 0.04115439 |
| wild <i>M. balbisiana</i> | Ma11_g03030 | 13.8697306 | -4.7607204 | 1.43557254 | -3.316252  | 0.00091234 | 0.04132878 |
| wild <i>M. balbisiana</i> | Ma08_g28550 | 35.8217624 | -1.7666634 | 0.53347625 | -3.3116064 | 0.00092762 | 0.04180116 |



**Comparative RNA-seq analysis of resistant and susceptible banana genotypes reveals molecular mechanisms in response to *Banana bunchy top virus* (BBTV)**

*Darlon V. Lantican, Jen Daine L. Nocum, Anand Noel C. Manohar, Jay-Vee S. Mendoza, Roanne R. Gardoce, Grace C. Lachica, Lavernee S. Gueco and Fe M. Dela Cueva*

Supplementary Table S2. List of differentially-expressed genes between mock- and BBTV-inoculated BBTV-resistant wild *M. balbisiana* and BBTV-susceptible Lakatan.

|                           |             |            |            |            |            |            |            |
|---------------------------|-------------|------------|------------|------------|------------|------------|------------|
| wild <i>M. balbisiana</i> | Ma08_g31080 | 80.8623919 | -1.4742615 | 0.44543079 | -3.3097433 | 0.00093382 | 0.04186121 |
| wild <i>M. balbisiana</i> | Ma08_g04840 | 13.9952898 | -3.5366177 | 1.07106658 | -3.3019588 | 0.00096012 | 0.04280018 |
| wild <i>M. balbisiana</i> | Ma08_g04160 | 50.9357316 | 1.82699369 | 0.5535301  | 3.30062212 | 0.00096471 | 0.04280018 |
| wild <i>M. balbisiana</i> | Ma11_g20540 | 22.9805053 | 2.17053138 | 0.65823014 | 3.29752656 | 0.0009754  | 0.04295514 |
| wild <i>M. balbisiana</i> | Ma02_g08260 | 34.2270218 | -2.0935462 | 0.63503757 | -3.2967281 | 0.00097818 | 0.04295514 |
| wild <i>M. balbisiana</i> | Ma03_g25870 | 54.1331429 | 1.88562209 | 0.57273726 | 3.29229859 | 0.00099372 | 0.04314616 |
| wild <i>M. balbisiana</i> | Ma04_g09590 | 11.4321504 | -3.1960364 | 0.97106592 | -3.2912661 | 0.00099738 | 0.04314616 |
| wild <i>M. balbisiana</i> | Ma09_g13780 | 16.5932587 | -2.5642845 | 0.77913097 | -3.2912112 | 0.00099757 | 0.04314616 |
| wild <i>M. balbisiana</i> | Ma02_g12040 | 21.0030509 | -3.3348595 | 1.01416605 | -3.2882776 | 0.00100802 | 0.0433391  |
| wild <i>M. balbisiana</i> | Ma06_g24210 | 59.2845592 | 1.61335006 | 0.49080648 | 3.28714092 | 0.0010121  | 0.0433391  |
| wild <i>M. balbisiana</i> | Ma07_g28050 | 17.5536534 | 3.22452346 | 0.9827023  | 3.28128209 | 0.00103336 | 0.04403049 |
| wild <i>M. balbisiana</i> | Ma01_g20450 | 22.2933823 | -1.9210215 | 0.5857041  | -3.2798499 | 0.00103862 | 0.04403661 |
| wild <i>M. balbisiana</i> | Ma06_g05910 | 13.1229953 | 2.83748811 | 0.86850124 | 3.26710886 | 0.00108652 | 0.04584151 |
| wild <i>M. balbisiana</i> | Ma02_g06390 | 15.5181552 | 2.76014965 | 0.84576054 | 3.26351199 | 0.00110041 | 0.04609015 |
| wild <i>M. balbisiana</i> | Ma04_g08150 | 8.48890049 | 4.25945668 | 1.30545525 | 3.26281325 | 0.00110312 | 0.04609015 |
| wild <i>M. balbisiana</i> | Ma06_g25800 | 175.439961 | -2.640868  | 0.81141948 | -3.2546273 | 0.00113541 | 0.04721013 |
| wild <i>M. balbisiana</i> | Ma01_g17040 | 67.1428846 | 2.13272313 | 0.65642615 | 3.2489917  | 0.00115815 | 0.04774312 |
| wild <i>M. balbisiana</i> | Ma09_g03420 | 36.3542753 | 2.75050503 | 0.84664716 | 3.24870282 | 0.00115933 | 0.04774312 |
| wild <i>M. balbisiana</i> | Ma05_g25290 | 44.3695095 | -1.7715224 | 0.54614628 | -3.2436774 | 0.00117997 | 0.04836204 |
| wild <i>M. balbisiana</i> | Ma04_g32970 | 20.583438  | -2.4680058 | 0.76210569 | -3.2384036 | 0.00120201 | 0.04861377 |
| wild <i>M. balbisiana</i> | Ma11_g21720 | 13.7007067 | 2.50679482 | 0.77410892 | 3.23829727 | 0.00120245 | 0.04861377 |
| wild <i>M. balbisiana</i> | Ma09_g14420 | 18.7222985 | 2.04331029 | 0.63101089 | 3.23815379 | 0.00120306 | 0.04861377 |
| Lakatan                   | Ma07_g10990 | 102.256969 | 5.30208335 | 0.65925183 | 8.04257657 | 8.80E-16   | 8.71E-12   |
| Lakatan                   | Ma07_g00170 | 395.892743 | 6.89999229 | 0.93055829 | 7.4148953  | 1.22E-13   | 6.03E-10   |

**Comparative RNA-seq analysis of resistant and susceptible banana genotypes reveals molecular mechanisms in response to *Banana bunchy top virus* (BBTV)**

*Darlon V. Lantican, Jen Daine L. Nocum, Anand Noel C. Manohar, Jay-Vee S. Mendoza, Roanne R. Gardoce, Grace C. Lachica, Lavernee S. Gueco and Fe M. Dela Cueva*

Supplementary Table S2. List of differentially-expressed genes between mock- and BBTV-inoculated BBTV-resistant wild *M. balbisiana* and BBTV-susceptible Lakatan.

|         |             |            |            |            |            |          |            |
|---------|-------------|------------|------------|------------|------------|----------|------------|
| Lakatan | Ma10_g11490 | 235.55852  | 7.87570646 | 1.22113142 | 6.44951588 | 1.12E-10 | 3.71E-07   |
| Lakatan | Ma03_g03480 | 150.685808 | 7.2002445  | 1.14436641 | 6.29190478 | 3.14E-10 | 7.77E-07   |
| Lakatan | Ma11_g01360 | 42.7809618 | -4.9367858 | 0.81077981 | -6.0889353 | 1.14E-09 | 2.25E-06   |
| Lakatan | Ma02_g01300 | 47.0929747 | -5.4062646 | 0.89558342 | -6.0365841 | 1.57E-09 | 2.60E-06   |
| Lakatan | Ma01_g16620 | 95.3458806 | -4.1412768 | 0.70250493 | -5.8950145 | 3.75E-09 | 5.30E-06   |
| Lakatan | Ma08_g21950 | 34.5695299 | -6.894889  | 1.17995107 | -5.8433686 | 5.12E-09 | 6.33E-06   |
| Lakatan | Ma08_g10330 | 112.058447 | 3.05053604 | 0.5592708  | 5.45448829 | 4.91E-08 | 5.41E-05   |
| Lakatan | Ma01_g22550 | 214.484552 | -5.218621  | 0.97246984 | -5.3663577 | 8.03E-08 | 7.96E-05   |
| Lakatan | Ma03_g32970 | 81.0751161 | -3.3752936 | 0.63252635 | -5.3362103 | 9.49E-08 | 8.55E-05   |
| Lakatan | Ma07_g12370 | 34.9481353 | 5.04016416 | 0.9539667  | 5.28337539 | 1.27E-07 | 0.00010469 |
| Lakatan | Ma09_g08600 | 45.4665777 | 4.07478123 | 0.77623894 | 5.24939038 | 1.53E-07 | 0.00011628 |
| Lakatan | Ma01_g21040 | 52.2448462 | -5.7163384 | 1.09898296 | -5.2014804 | 1.98E-07 | 0.00013989 |
| Lakatan | Ma09_g25280 | 73.2147746 | 3.19489558 | 0.61892041 | 5.16204596 | 2.44E-07 | 0.00016131 |
| Lakatan | Ma00_g00510 | 74.9387211 | 5.76194099 | 1.14574289 | 5.029      | 4.93E-07 | 0.00030526 |
| Lakatan | Ma06_g33250 | 62.4409956 | -4.6371312 | 0.92644141 | -5.0053151 | 5.58E-07 | 0.00032498 |
| Lakatan | Ma06_g36640 | 35.1258952 | 4.46119053 | 0.89501931 | 4.98446288 | 6.21E-07 | 0.00033583 |
| Lakatan | Ma10_g20080 | 153.130761 | -4.4419398 | 0.8924049  | -4.9774937 | 6.44E-07 | 0.00033583 |
| Lakatan | Ma06_g18390 | 46.7780566 | 3.78122568 | 0.77474069 | 4.88063392 | 1.06E-06 | 0.00051139 |
| Lakatan | Ma05_g15310 | 83.223802  | -3.6618186 | 0.75103091 | -4.8757228 | 1.08E-06 | 0.00051139 |
| Lakatan | Ma01_g01670 | 199.589805 | -3.2584962 | 0.67032538 | -4.8610664 | 1.17E-06 | 0.00052572 |
| Lakatan | Ma04_g16680 | 147.102042 | -3.3838376 | 0.7039842  | -4.8066955 | 1.53E-06 | 0.00066088 |
| Lakatan | Ma05_g12140 | 23.7764283 | 5.08685159 | 1.06754565 | 4.76499677 | 1.89E-06 | 0.00075844 |
| Lakatan | Ma06_g12410 | 25.9513459 | -4.5498359 | 0.95538845 | -4.762289  | 1.91E-06 | 0.00075844 |
| Lakatan | Ma02_g00510 | 32.3812996 | 3.24491236 | 0.68790071 | 4.71712316 | 2.39E-06 | 0.00091136 |

**Comparative RNA-seq analysis of resistant and susceptible banana genotypes reveals molecular mechanisms in response to *Banana bunchy top virus* (BBTV)**

*Darlon V. Lantican, Jen Daine L. Nocum, Anand Noel C. Manohar, Jay-Vee S. Mendoza, Roanne R. Gardoce, Grace C. Lachica, Lavernee S. Gueco and Fe M. Dela Cueva*

Supplementary Table S2. List of differentially-expressed genes between mock- and BBTV-inoculated BBTV-resistant wild *M. balbisiana* and BBTV-susceptible Lakatan.

|         |             |            |            |            |            |          |            |
|---------|-------------|------------|------------|------------|------------|----------|------------|
| Lakatan | Ma08_g07100 | 62.5904816 | 3.28477174 | 0.70314808 | 4.671522   | 2.99E-06 | 0.00109691 |
| Lakatan | Ma10_g15170 | 219.903607 | -3.3953304 | 0.72968147 | -4.6531679 | 3.27E-06 | 0.00115643 |
| Lakatan | Ma02_g17130 | 252.76372  | -2.4896422 | 0.54047639 | -4.6063848 | 4.10E-06 | 0.00139958 |
| Lakatan | Ma08_g15460 | 36.7820919 | -4.4209429 | 0.96740942 | -4.5698779 | 4.88E-06 | 0.00160532 |
| Lakatan | Ma11_g06590 | 111.47152  | 2.42889173 | 0.53220883 | 4.56379452 | 5.02E-06 | 0.00160532 |
| Lakatan | Ma09_g03420 | 33.612383  | 3.90610484 | 0.86244441 | 4.52910912 | 5.92E-06 | 0.00183363 |
| Lakatan | Ma10_g21920 | 62.2412982 | -3.3207243 | 0.73556049 | -4.5145496 | 6.35E-06 | 0.0019047  |
| Lakatan | Ma11_g14200 | 80.8291774 | -3.0735804 | 0.68574606 | -4.4820971 | 7.39E-06 | 0.00215348 |
| Lakatan | Ma02_g24260 | 26.4744137 | 5.21925161 | 1.1703028  | 4.45974463 | 8.21E-06 | 0.00227165 |
| Lakatan | Ma09_g22570 | 128.832703 | 2.80156984 | 0.62899951 | 4.45400955 | 8.43E-06 | 0.00227165 |
| Lakatan | Ma08_g10850 | 63.6720501 | -3.0946675 | 0.69532394 | -4.4506846 | 8.56E-06 | 0.00227165 |
| Lakatan | Ma03_g05910 | 96.5238209 | -4.0566985 | 0.91226507 | -4.4468419 | 8.71E-06 | 0.00227165 |
| Lakatan | Ma09_g30010 | 57.5119985 | 2.81438251 | 0.63478512 | 4.43359876 | 9.27E-06 | 0.00235389 |
| Lakatan | Ma02_g18000 | 134.937842 | -3.2698645 | 0.74339398 | -4.398562  | 1.09E-05 | 0.00269865 |
| Lakatan | Ma11_g07100 | 246.054449 | -2.6578086 | 0.60649695 | -4.3822291 | 1.17E-05 | 0.00283822 |
| Lakatan | Ma02_g14600 | 21.3344341 | 3.76668958 | 0.86457274 | 4.35670637 | 1.32E-05 | 0.00311412 |
| Lakatan | Ma03_g29410 | 244.242434 | -4.7641815 | 1.09660304 | -4.3444906 | 1.40E-05 | 0.00321598 |
| Lakatan | Ma04_g31960 | 17.5639134 | 3.78489723 | 0.87245555 | 4.33821212 | 1.44E-05 | 0.003234   |
| Lakatan | Ma11_g14880 | 19.1334581 | 3.95302175 | 0.91385    | 4.32567898 | 1.52E-05 | 0.00334741 |
| Lakatan | Ma10_g19080 | 255.318051 | -2.7359012 | 0.63407955 | -4.3147602 | 1.60E-05 | 0.00344075 |
| Lakatan | Ma06_g29050 | 301.297634 | -3.1420661 | 0.72989671 | -4.3048092 | 1.67E-05 | 0.00352253 |
| Lakatan | Ma03_g31670 | 93.5723511 | -2.4862801 | 0.57979841 | -4.2881802 | 1.80E-05 | 0.00371099 |
| Lakatan | Ma01_g09220 | 71.1631258 | 2.4002617  | 0.56028536 | 4.28399859 | 1.84E-05 | 0.00371099 |
| Lakatan | Ma03_g14330 | 26.4147918 | -2.6622784 | 0.62222895 | -4.2786155 | 1.88E-05 | 0.00372583 |

**Comparative RNA-seq analysis of resistant and susceptible banana genotypes reveals molecular mechanisms in response to *Banana bunchy top virus* (BBTV)**

*Darlon V. Lantican, Jen Daine L. Nocum, Anand Noel C. Manohar, Jay-Vee S. Mendoza, Roanne R. Gardoce, Grace C. Lachica, Lavernee S. Gueco and Fe M. Dela Cueva*

Supplementary Table S2. List of differentially-expressed genes between mock- and BBTV-inoculated BBTV-resistant wild *M. balbisiana* and BBTV-susceptible Lakatan.

|         |             |            |            |            |            |          |            |
|---------|-------------|------------|------------|------------|------------|----------|------------|
| Lakatan | Ma06_g31170 | 72.282478  | 3.50423785 | 0.82274758 | 4.25918949 | 2.05E-05 | 0.00398512 |
| Lakatan | Ma08_g23180 | 868.355888 | 3.39680301 | 0.80872781 | 4.20018079 | 2.67E-05 | 0.00508067 |
| Lakatan | Ma06_g30390 | 820.685634 | 3.44647391 | 0.82532181 | 4.17591523 | 2.97E-05 | 0.00554718 |
| Lakatan | Ma09_g06560 | 105.176148 | -3.1173481 | 0.7499153  | -4.1569336 | 3.23E-05 | 0.00591696 |
| Lakatan | Ma01_g15210 | 45.530882  | 2.09440819 | 0.50460091 | 4.15062312 | 3.32E-05 | 0.0059719  |
| Lakatan | Ma06_g35530 | 207.364919 | 3.74347115 | 0.90570119 | 4.13322978 | 3.58E-05 | 0.00622974 |
| Lakatan | Ma06_g32100 | 88.5016661 | 2.02812544 | 0.49074601 | 4.13273953 | 3.58E-05 | 0.00622974 |
| Lakatan | Ma08_g21090 | 46.8055026 | -2.7428978 | 0.66781199 | -4.1072904 | 4.00E-05 | 0.00683732 |
| Lakatan | Ma01_g04190 | 26.4472928 | -2.7399732 | 0.66776811 | -4.1031806 | 4.08E-05 | 0.006842   |
| Lakatan | Ma04_g01330 | 260.231555 | -2.257402  | 0.55362292 | -4.0775082 | 4.55E-05 | 0.0075155  |
| Lakatan | Ma03_g10270 | 61.1863791 | 3.07187215 | 0.75667145 | 4.05971727 | 4.91E-05 | 0.00797874 |
| Lakatan | Ma10_g11130 | 140.752652 | -3.0921129 | 0.76578669 | -4.0378253 | 5.39E-05 | 0.00861966 |
| Lakatan | Ma06_g16330 | 27.5383845 | -3.4342823 | 0.85627553 | -4.0107211 | 6.05E-05 | 0.00942232 |
| Lakatan | Ma03_g21600 | 32.7767255 | 6.1085455  | 1.52355876 | 4.00939278 | 6.09E-05 | 0.00942232 |
| Lakatan | Ma04_g14870 | 147.552591 | -2.0456123 | 0.51117235 | -4.0018054 | 6.29E-05 | 0.00950189 |
| Lakatan | Ma08_g24690 | 54.5165044 | 2.73055306 | 0.68265481 | 3.99990304 | 6.34E-05 | 0.00950189 |
| Lakatan | Ma05_g25290 | 133.516671 | -2.3539228 | 0.58898568 | -3.9965704 | 6.43E-05 | 0.00950189 |
| Lakatan | Ma10_g05590 | 258.475504 | -3.1709081 | 0.79797388 | -3.9736991 | 7.08E-05 | 0.01030879 |
| Lakatan | Ma06_g00750 | 59.8126234 | -2.8877816 | 0.72841482 | -3.964474  | 7.36E-05 | 0.01056037 |
| Lakatan | Ma11_g20430 | 143.196031 | 1.6189345  | 0.4089984  | 3.95829058 | 7.55E-05 | 0.01066893 |
| Lakatan | Ma07_g13740 | 205.539329 | -3.1490096 | 0.79616795 | -3.9552077 | 7.65E-05 | 0.01066893 |
| Lakatan | Ma01_g07220 | 111.795089 | -2.6002839 | 0.66303823 | -3.9217707 | 8.79E-05 | 0.01209366 |
| Lakatan | Ma00_g01690 | 115.120741 | 2.30603142 | 0.59003563 | 3.9082918  | 9.30E-05 | 0.01256386 |
| Lakatan | Ma10_g08680 | 51.4919519 | -2.300931  | 0.58917384 | -3.9053517 | 9.41E-05 | 0.01256386 |

**Comparative RNA-seq analysis of resistant and susceptible banana genotypes reveals molecular mechanisms in response to *Banana bunchy top virus* (BBTV)**

*Darlon V. Lantican, Jen Daine L. Nocum, Anand Noel C. Manohar, Jay-Vee S. Mendoza, Roanne R. Gardoce, Grace C. Lachica, Lavernee S. Gueco and Fe M. Dela Cueva*

Supplementary Table S2. List of differentially-expressed genes between mock- and BBTV-inoculated BBTV-resistant wild *M. balbisiana* and BBTV-susceptible Lakatan.

|         |              |            |            |            |            |            |            |
|---------|--------------|------------|------------|------------|------------|------------|------------|
| Lakatan | Ma10_g19060  | 14.7889704 | 4.29390994 | 1.10023908 | 3.90270625 | 9.51E-05   | 0.01256386 |
| Lakatan | Ma05_g21470  | 79.9908685 | -2.4685832 | 0.63586123 | -3.8822673 | 0.00010349 | 0.01344449 |
| Lakatan | Ma10_g14160  | 147.710028 | -3.4675062 | 0.89371316 | -3.8798871 | 0.0001045  | 0.01344449 |
| Lakatan | Ma04_g37140  | 144.853232 | 1.84767344 | 0.47706909 | 3.87296829 | 0.00010752 | 0.01365476 |
| Lakatan | Ma04_g37990  | 212.544696 | -2.0815241 | 0.54101296 | -3.8474571 | 0.00011935 | 0.0149172  |
| Lakatan | mito3_g00190 | 4324.51947 | -3.0435493 | 0.7917052  | -3.8442962 | 0.0001209  | 0.0149172  |
| Lakatan | Ma03_g17480  | 139.005528 | -3.1380071 | 0.81712784 | -3.840289  | 0.00012289 | 0.0149172  |
| Lakatan | Ma06_g36160  | 71.8041679 | -2.9452638 | 0.76717385 | -3.8391087 | 0.00012348 | 0.0149172  |
| Lakatan | Ma05_g08440  | 16.2015383 | 4.9220099  | 1.2860257  | 3.82730291 | 0.00012956 | 0.0153685  |
| Lakatan | Ma06_g23640  | 108.088103 | 2.74544842 | 0.71760439 | 3.82585231 | 0.00013032 | 0.0153685  |
| Lakatan | Ma11_g12630  | 53.6258245 | 2.55505828 | 0.66844609 | 3.82238497 | 0.00013217 | 0.01540291 |
| Lakatan | Ma03_g05660  | 39.4140545 | 4.45631175 | 1.16722335 | 3.81787406 | 0.00013461 | 0.0155048  |
| Lakatan | Ma06_g18280  | 134.034927 | -1.7331933 | 0.45520931 | -3.8074645 | 0.0001404  | 0.0159861  |
| Lakatan | Ma09_g08110  | 149.897963 | 2.85167497 | 0.75139875 | 3.79515531 | 0.00014755 | 0.01650746 |
| Lakatan | Ma06_g26470  | 74.732237  | -2.9863659 | 0.7871532  | -3.7938815 | 0.00014831 | 0.01650746 |
| Lakatan | Ma09_g04960  | 102.072693 | -2.447174  | 0.64656272 | -3.784898  | 0.00015377 | 0.01690872 |
| Lakatan | Ma07_g09610  | 442.925616 | 2.90005091 | 0.76700943 | 3.78098471 | 0.00015621 | 0.01690872 |
| Lakatan | Ma08_g10940  | 89.840984  | -3.1152796 | 0.82438407 | -3.7789177 | 0.00015751 | 0.01690872 |
| Lakatan | Ma06_g30910  | 93.9324146 | -3.2066659 | 0.84900326 | -3.7769771 | 0.00015874 | 0.01690872 |
| Lakatan | Ma04_g15280  | 16.1952172 | -4.3243128 | 1.14945649 | -3.76205   | 0.00016853 | 0.01775981 |
| Lakatan | Ma07_g15780  | 21.3154844 | -5.5405674 | 1.48639232 | -3.7275269 | 0.00019337 | 0.01985189 |
| Lakatan | Ma11_g13780  | 144.316485 | 2.36212275 | 0.6339     | 3.72633341 | 0.00019429 | 0.01985189 |
| Lakatan | Ma06_g25800  | 155.48361  | -3.1099949 | 0.83477097 | -3.7255666 | 0.00019488 | 0.01985189 |
| Lakatan | Ma06_g27370  | 164.099516 | -2.2425841 | 0.6027283  | -3.7207214 | 0.00019865 | 0.01985189 |

**Comparative RNA-seq analysis of resistant and susceptible banana genotypes reveals molecular mechanisms in response to *Banana bunchy top virus* (BBTV)**

*Darlon V. Lantican, Jen Daine L. Nocum, Anand Noel C. Manohar, Jay-Vee S. Mendoza, Roanne R. Gardoce, Grace C. Lachica, Lavernee S. Gueco and Fe M. Dela Cueva*

Supplementary Table S2. List of differentially-expressed genes between mock- and BBTV-inoculated BBTV-resistant wild *M. balbisiana* and BBTV-susceptible Lakatan.

|         |             |            |            |            |            |            |            |
|---------|-------------|------------|------------|------------|------------|------------|------------|
| Lakatan | Ma04_g12630 | 30.8108896 | 3.00359343 | 0.8072914  | 3.72058145 | 0.00019876 | 0.01985189 |
| Lakatan | Ma10_g20950 | 321.94642  | 3.54902781 | 0.95488793 | 3.71669564 | 0.00020185 | 0.01985189 |
| Lakatan | Ma05_g04870 | 33.5844949 | 2.38887495 | 0.64286305 | 3.71599354 | 0.00020241 | 0.01985189 |
| Lakatan | Ma08_g06150 | 21.5297701 | 3.8962742  | 1.0505391  | 3.70883311 | 0.00020822 | 0.02016116 |
| Lakatan | Ma08_g22930 | 37.3683381 | -2.2159853 | 0.5977648  | -3.707119  | 0.00020963 | 0.02016116 |
| Lakatan | Ma03_g29390 | 27.3235739 | 3.26881245 | 0.88277027 | 3.70290273 | 0.00021315 | 0.02030222 |
| Lakatan | Ma06_g09580 | 128.31664  | 1.43842216 | 0.38984897 | 3.68969081 | 0.00022453 | 0.0211825  |
| Lakatan | Ma06_g32730 | 20.5737377 | 2.93390157 | 0.79728293 | 3.67987505 | 0.00023335 | 0.02180706 |
| Lakatan | Ma06_g27170 | 16.5523282 | -5.1760279 | 1.41477361 | -3.6585556 | 0.00025364 | 0.02328941 |
| Lakatan | Ma06_g00390 | 34.5350919 | -2.2662746 | 0.61949165 | -3.6582812 | 0.00025391 | 0.02328941 |
| Lakatan | Ma11_g09120 | 38.6865311 | 2.60964995 | 0.71629059 | 3.64328388 | 0.00026918 | 0.02446343 |
| Lakatan | Ma07_g07360 | 23.3449646 | 2.53686736 | 0.69736333 | 3.63779865 | 0.00027498 | 0.02454183 |
| Lakatan | Ma08_g22590 | 25.6638948 | -3.0522339 | 0.83903776 | -3.6377789 | 0.000275   | 0.02454183 |
| Lakatan | Ma06_g01470 | 50.7643043 | 1.99600983 | 0.55026318 | 3.62737304 | 0.00028632 | 0.02532394 |
| Lakatan | Ma03_g14240 | 294.747374 | 1.56398331 | 0.4318314  | 3.62174521 | 0.00029262 | 0.02546559 |
| Lakatan | Ma06_g16250 | 17.8058158 | 3.88499688 | 1.07280161 | 3.62135631 | 0.00029306 | 0.02546559 |
| Lakatan | Ma03_g02600 | 85.5276769 | -2.0608352 | 0.5698688  | -3.6163327 | 0.00029881 | 0.02573892 |
| Lakatan | Ma02_g05270 | 196.422946 | 3.67977896 | 1.01971126 | 3.60864796 | 0.0003078  | 0.0262848  |
| Lakatan | Ma10_g26330 | 45.1557221 | 4.18511818 | 1.16228281 | 3.60077439 | 0.00031727 | 0.02686226 |
| Lakatan | Ma11_g08690 | 17.5192369 | -5.1898113 | 1.44395527 | -3.5941635 | 0.00032544 | 0.02732003 |
| Lakatan | Ma07_g21640 | 16.5259027 | 2.60924774 | 0.72750733 | 3.58655872 | 0.00033507 | 0.02789252 |
| Lakatan | Ma00_g02720 | 556.855253 | -1.5602374 | 0.43551395 | -3.5825199 | 0.0003403  | 0.02809141 |
| Lakatan | Ma10_g20770 | 13.8379083 | 3.53500786 | 0.99175515 | 3.56439578 | 0.0003647  | 0.02985679 |
| Lakatan | Ma03_g18330 | 1037.12345 | -2.3614096 | 0.66346565 | -3.559204  | 0.00037198 | 0.03004634 |

**Comparative RNA-seq analysis of resistant and susceptible banana genotypes reveals molecular mechanisms in response to *Banana bunchy top virus* (BBTV)**

*Darlon V. Lantican, Jen Daine L. Nocum, Anand Noel C. Manohar, Jay-Vee S. Mendoza, Roanne R. Gardoce, Grace C. Lachica, Lavernee S. Gueco and Fe M. Dela Cueva*

Supplementary Table S2. List of differentially-expressed genes between mock- and BBTV-inoculated BBTV-resistant wild *M. balbisiana* and BBTV-susceptible Lakatan.

|         |             |            |            |            |            |            |            |
|---------|-------------|------------|------------|------------|------------|------------|------------|
| Lakatan | Ma03_g23150 | 96.0507547 | 2.34660882 | 0.65945043 | 3.55843094 | 0.00037308 | 0.03004634 |
| Lakatan | Ma02_g21520 | 38.6121347 | -4.3110497 | 1.21448235 | -3.5497014 | 0.00038567 | 0.03080992 |
| Lakatan | Ma08_g27750 | 22.9390021 | 2.69830482 | 0.76296292 | 3.53661332 | 0.00040529 | 0.03211863 |
| Lakatan | Ma02_g14310 | 20.0126788 | -3.1945888 | 0.90434073 | -3.5325057 | 0.00041164 | 0.03232746 |
| Lakatan | Ma11_g15590 | 34.3525048 | 2.83810911 | 0.80383651 | 3.53070441 | 0.00041445 | 0.03232746 |
| Lakatan | Ma10_g13420 | 126.717543 | 1.38743229 | 0.39410137 | 3.52049599 | 0.00043074 | 0.03333528 |
| Lakatan | Ma03_g08170 | 38.8310624 | 3.06668924 | 0.87185698 | 3.51742235 | 0.00043576 | 0.0334623  |
| Lakatan | Ma02_g24860 | 194.054274 | -2.4745564 | 0.70580261 | -3.5060177 | 0.00045486 | 0.03466071 |
| Lakatan | Ma06_g31610 | 98.6856995 | 1.66150085 | 0.47693489 | 3.48370579 | 0.00049452 | 0.03739498 |
| Lakatan | Ma01_g14940 | 574.532748 | -2.2189807 | 0.63758802 | -3.4802736 | 0.0005009  | 0.03759042 |
| Lakatan | Ma03_g25870 | 62.4296574 | 2.2877144  | 0.6593097  | 3.46986309 | 0.00052072 | 0.03878413 |
| Lakatan | Ma07_g11510 | 25.7596584 | 2.89410445 | 0.83462706 | 3.46754206 | 0.00052524 | 0.03879018 |
| Lakatan | Ma03_g20940 | 90.2194059 | -2.3197739 | 0.66958098 | -3.4645159 | 0.00053119 | 0.03879018 |
| Lakatan | Ma03_g05310 | 41.0383821 | -1.9713776 | 0.56913311 | -3.4638252 | 0.00053255 | 0.03879018 |
| Lakatan | Ma09_g10410 | 42.638606  | -3.2034425 | 0.92620317 | -3.4586823 | 0.00054282 | 0.03924979 |
| Lakatan | Ma05_g03580 | 56.0533071 | -4.2301399 | 1.22613281 | -3.4499851 | 0.00056062 | 0.03970835 |
| Lakatan | Ma11_g03670 | 36.1170675 | 2.3680479  | 0.68656038 | 3.44914735 | 0.00056236 | 0.03970835 |
| Lakatan | Ma09_g03120 | 21.2833652 | -2.6151874 | 0.75860325 | -3.4473717 | 0.00056607 | 0.03970835 |
| Lakatan | Ma02_g07680 | 17.948552  | 2.86980136 | 0.83257068 | 3.44691619 | 0.00056702 | 0.03970835 |
| Lakatan | Ma09_g06790 | 64.895146  | 2.55120686 | 0.7404251  | 3.44559747 | 0.0005698  | 0.03970835 |
| Lakatan | Ma08_g21820 | 396.425663 | -1.884064  | 0.54706006 | -3.4439802 | 0.00057322 | 0.03970835 |
| Lakatan | Ma10_g19400 | 15.7573904 | 4.70231043 | 1.36715906 | 3.43947574 | 0.00058284 | 0.04009467 |
| Lakatan | Ma06_g25920 | 45.5421148 | 1.93187393 | 0.56260185 | 3.43382079 | 0.00059514 | 0.04048733 |
| Lakatan | Ma10_g13860 | 46.5011843 | 2.08904279 | 0.6085006  | 3.43309899 | 0.00059672 | 0.04048733 |

**Comparative RNA-seq analysis of resistant and susceptible banana genotypes reveals molecular mechanisms in response to *Banana bunchy top virus* (BBTV)**

*Darlon V. Lantican, Jen Daine L. Nocum, Anand Noel C. Manohar, Jay-Vee S. Mendoza, Roanne R. Gardoce, Grace C. Lachica, Lavernee S. Gueco and Fe M. Dela Cueva*

Supplementary Table S2. List of differentially-expressed genes between mock- and BBTV-inoculated BBTV-resistant wild *M. balbisiana* and BBTV-susceptible Lakatan.

|         |               |            |            |            |            |            |            |
|---------|---------------|------------|------------|------------|------------|------------|------------|
| Lakatan | Ma03_g01310   | 189.937436 | -1.6001193 | 0.46690907 | -3.4270469 | 0.00061018 | 0.0411189  |
| Lakatan | Ma08_g05970   | 15.6089614 | 2.91222461 | 0.85242676 | 3.41639277 | 0.00063457 | 0.04247308 |
| Lakatan | Ma03_g30490   | 20.6974277 | 2.5581271  | 0.75086837 | 3.40689154 | 0.00065707 | 0.04349677 |
| Lakatan | Ma02_g24950   | 14.4704094 | -2.9008541 | 0.85176626 | -3.4056926 | 0.00065996 | 0.04349677 |
| Lakatan | Ma07_g20820   | 479.957647 | -2.717043  | 0.79809148 | -3.4044255 | 0.00066303 | 0.04349677 |
| Lakatan | Ma05_g00150   | 16.0274692 | -4.0785452 | 1.20621605 | -3.3812726 | 0.00072151 | 0.04702152 |
| Lakatan | Ma04_g21660   | 132.442071 | -2.7326522 | 0.80884425 | -3.3784653 | 0.00072892 | 0.04719376 |
| Lakatan | Ma06_g14630   | 31.8187809 | -1.8219677 | 0.5400487  | -3.3737099 | 0.00074162 | 0.04770477 |
| Lakatan | Ma04_g33050   | 161.150581 | -1.8201995 | 0.54015897 | -3.3697479 | 0.00075237 | 0.04808372 |
| Lakatan | Ma06_g22120   | 21.5102841 | 4.45667834 | 1.32426578 | 3.36539568 | 0.00076434 | 0.04828559 |
| Lakatan | mito11_g00040 | 6941.2418  | -1.3077083 | 0.38861398 | -3.3650574 | 0.00076528 | 0.04828559 |
| Lakatan | Ma11_g02330   | 43.585705  | -3.1687216 | 0.94290368 | -3.3605995 | 0.00077774 | 0.04876104 |
| Lakatan | Ma07_g25830   | 32.9271186 | -3.0254152 | 0.90124886 | -3.3569143 | 0.00078818 | 0.04910481 |
| Lakatan | Ma04_g39130   | 81.2862477 | 2.40178643 | 0.71661139 | 3.35158841 | 0.00080349 | 0.04960405 |
| Lakatan | Ma09_g00790   | 52.2579742 | -3.0356552 | 0.90598828 | -3.3506561 | 0.0008062  | 0.04960405 |
