# Supplementary material for: Comparative RNA-seq analysis of resistant and susceptible banana genotypes reveals molecular mechanisms in response to banana bunchy top virus (BBTV) infection
Source: PubMed Central journal article supplement (PMC10618458; doi:10.1038/s41598-023-45937-z), 2023-10-31
Supplement: 41598_2023_45937_MOESM3_ESM.pdf [file 41598_2023_45937_MOESM3_ESM.pdf]

**Comparative RNA-seq analysis of resistant and susceptible banana genotypes reveals molecular mechanisms in response to *Banana bunchy top virus* (BBTV) infection**

*Darlon V. Lantican, Jen Daine L. Nocum, Anand Noel C. Manohar, Jay-Vee S. Mendoza, Roanne R. Gardoce, Grace C. Lachica, Lavernee S. Gueco and Fe M. Dela Cueva*

Supplementary Table S3. List of enriched ( $p_{adj} < 0.075$ ) gene ontology terms in response of *wild M. balbisiana* and Lakatan to BBTV inoculation with mock-inoculated samples as baseline control.

| Genotype           | GOType             | ID         | Description                                    | GeneRatio | BgRatio   | pvalue     | p.adjust   | qvalue     | Count |
|--------------------|--------------------|------------|------------------------------------------------|-----------|-----------|------------|------------|------------|-------|
| wild M. balbisiana | Biological Process | GO:0005985 | sucrose metabolic process                      | 4/184     | 24/34320  | 7.81E-06   | 0.00115238 | 0.00095398 | 4     |
| wild M. balbisiana | Biological Process | GO:0007623 | circadian rhythm                               | 5/184     | 87/34320  | 0.00010859 | 0.00678848 | 0.00561972 | 5     |
| wild M. balbisiana | Biological Process | GO:0042752 | regulation of circadian rhythm                 | 4/184     | 46/34320  | 0.00010943 | 0.00678848 | 0.00561972 | 4     |
| wild M. balbisiana | Biological Process | GO:0071456 | cellular response to hypoxia                   | 5/184     | 116/34320 | 0.00041596 | 0.01873718 | 0.01551124 | 5     |
| wild M. balbisiana | Biological Process | GO:0009640 | photomorphogenesis                             | 4/184     | 66/34320  | 0.00044461 | 0.01873718 | 0.01551124 | 4     |
| wild M. balbisiana | Biological Process | GO:0009704 | de-etiolation ammonium transmembrane transport | 2/184     | 10/34320  | 0.00125058 | 0.03689217 | 0.03054053 | 2     |
| wild M. balbisiana | Biological Process | GO:0072488 | carbon fixation                                | 2/184     | 12/34320  | 0.00182129 | 0.04218209 | 0.03491969 | 2     |
| wild M. balbisiana | Biological Process | GO:0015977 | green leaf volatile biosynthetic process       | 3/184     | 13/34320  | 0.00214485 | 0.04218209 | 0.03491969 | 2     |
| wild M. balbisiana | Biological Process | GO:0010597 | flavonoid biosynthetic process                 | 3/184     | 49/34320  | 0.0023301  | 0.04296127 | 0.03556473 | 3     |
| wild M. balbisiana | Biological Process | GO:0009813 | flavonoid biosynthetic process                 | 3/184     | 51/34320  | 0.0026132  | 0.04534676 | 0.03753951 | 3     |

**Comparative RNA-seq analysis of resistant and susceptible banana genotypes reveals molecular mechanisms in response to *Banana bunchy top virus* (BBTV) infection**

*Darlon V. Lantican, Jen Daine L. Nocum, Anand Noel C. Manohar, Jay-Vee S. Mendoza, Roanne R. Gardoce, Grace C. Lachica, Lavernee S. Gueco and Fe M. Dela Cueva*

Supplementary Table S3. List of enriched ( $p_{adj} < 0.075$ ) gene ontology terms in response of *wild M. balbisiana* and Lakatan to BBTV inoculation with mock-inoculated samples as baseline control.

|                    |                    |            |                                                                                                 |       |          |            |            |            |   |
|--------------------|--------------------|------------|-------------------------------------------------------------------------------------------------|-------|----------|------------|------------|------------|---|
| wild M. balbisiana | Molecular Function | GO:0016157 | sucrose synthase activity                                                                       | 4/184 | 14/34320 | 7.68E-07   | 0.00022642 | 0.00018744 | 4 |
| wild M. balbisiana | Molecular Function | GO:0008237 | metallopeptidase activity                                                                       | 3/184 | 30/34320 | 0.00055326 | 0.02040163 | 0.01688913 | 3 |
| wild M. balbisiana | Molecular Function | GO:0015301 | anion:anion antiporter activity                                                                 | 2/184 | 12/34320 | 0.00182129 | 0.04218209 | 0.03491969 | 2 |
| wild M. balbisiana | Molecular Function | GO:0008519 | ammonium transmembrane transporter activity                                                     | 2/184 | 13/34320 | 0.00214485 | 0.04218209 | 0.03491969 | 2 |
| wild M. balbisiana | Molecular Function | GO:0004311 | farnesyltransferase activity                                                                    | 2/184 | 15/34320 | 0.00286702 | 0.04698726 | 0.03889757 | 2 |
| wild M. balbisiana | Molecular Function | GO:0016620 | oxidoreductase activity, acting on the aldehyde or oxo group of donors, NAD or NADP as acceptor | 3/184 | 54/34320 | 0.00307616 | 0.04776139 | 0.03953842 | 3 |
| Lakatan            | Biological Process | GO:0042752 | regulation of circadian rhythm                                                                  | 6/142 | 46/34320 | 3.69E-08   | 9.84E-06   | 7.68E-06   | 6 |
| Lakatan            | Biological Process | GO:0007623 | circadian rhythm                                                                                | 7/142 | 87/34320 | 7.93E-08   | 1.06E-05   | 8.26E-06   | 7 |
| Lakatan            | Biological Process | GO:0048511 | rhythmic process                                                                                | 5/142 | 62/34320 | 6.05E-06   | 0.00040366 | 0.0003151  | 5 |
| Lakatan            | Biological Process | GO:0009640 | photomorphogenesis                                                                              | 5/142 | 66/34320 | 8.24E-06   | 0.0004401  | 0.00034355 | 5 |

**Comparative RNA-seq analysis of resistant and susceptible banana genotypes reveals molecular mechanisms in response to *Banana bunchy top virus* (BBTV) infection**

*Darlon V. Lantican, Jen Daine L. Nocum, Anand Noel C. Manohar, Jay-Vee S. Mendoza, Roanne R. Gardoce, Grace C. Lachica, Lavernee S. Gueco and Fe M. Dela Cueva*

Supplementary Table S3. List of enriched ( $p_{adj} < 0.075$ ) gene ontology terms in response of *wild M. balbisiana* and Lakatan to BBTV inoculation with mock-inoculated samples as baseline control.

|         |                    |            |                                                        |       |           |            |            |            |   |
|---------|--------------------|------------|--------------------------------------------------------|-------|-----------|------------|------------|------------|---|
| Lakatan | Biological Process | GO:0009637 | response to blue light                                 | 4/142 | 34/34320  | 1.18E-05   | 0.00052635 | 0.00041087 | 4 |
| Lakatan | Biological Process | GO:0006457 | protein folding                                        | 6/142 | 201/34320 | 0.00019791 | 0.00754897 | 0.00589275 | 6 |
| Lakatan | Biological Process | GO:0009615 | response to virus                                      | 3/142 | 36/34320  | 0.00044797 | 0.014662   | 0.0114452  | 3 |
| Lakatan | Biological Process | GO:0009408 | response to heat                                       | 5/142 | 156/34320 | 0.00049422 | 0.014662   | 0.0114452  | 5 |
| Lakatan | Biological Process | GO:0042026 | protein refolding chaperone cofactor-dependent protein | 3/142 | 44/34320  | 0.0008111  | 0.01714831 | 0.01338603 | 3 |
| Lakatan | Biological Process | GO:0051085 | refolding DNA-templated                                | 3/142 | 47/34320  | 0.0009841  | 0.01714831 | 0.01338603 | 3 |
| Lakatan | Biological Process | GO:0006354 | transcription, elongation                              | 2/142 | 12/34320  | 0.00109184 | 0.01714831 | 0.01338603 | 2 |
| Lakatan | Biological Process | GO:0010187 | negative regulation of seed germination                | 2/142 | 13/34320  | 0.00128686 | 0.0190884  | 0.01490047 | 2 |
| Lakatan | Biological Process | GO:0009649 | entrainment of circadian clock                         | 3/142 | 54/34320  | 0.00147392 | 0.02071243 | 0.01616819 | 3 |
| Lakatan | Biological Process | GO:0009266 | response to temperature stimulus                       | 2/142 | 15/34320  | 0.00172293 | 0.02297043 | 0.01793079 | 2 |

**Comparative RNA-seq analysis of resistant and susceptible banana genotypes reveals molecular mechanisms in response to *Banana bunchy top virus* (BBTV) infection**

*Darlon V. Lantican, Jen Daine L. Nocum, Anand Noel C. Manohar, Jay-Vee S. Mendoza, Roanne R. Gardoce, Grace C. Lachica, Lavernee S. Gueco and Fe M. Dela Cueva*

Supplementary Table S3. List of enriched ( $p_{adj} < 0.075$ ) gene ontology terms in response of *wild M. balbisiana* and Lakatan to BBTV inoculation with mock-inoculated samples as baseline control.

|         |                    |            |                                                     |       |           |            |            |            |   |
|---------|--------------------|------------|-----------------------------------------------------|-------|-----------|------------|------------|------------|---|
| Lakatan | Biological Process | GO:0045892 | negative regulation of transcription, DNA-templated | 6/142 | 307/34320 | 0.00180666 | 0.02297043 | 0.01793079 | 6 |
| Lakatan | Biological Process | GO:0006396 | RNA processing                                      | 4/142 | 129/34320 | 0.00207308 | 0.02406572 | 0.01878578 | 4 |
| Lakatan | Biological Process | GO:2000028 | regulation of photoperiodism, flowering             | 3/142 | 76/34320  | 0.00390993 | 0.041758   | 0.03259643 | 3 |
| Lakatan | Biological Process | GO:0034620 | cellular response to unfolded protein               | 2/142 | 24/34320  | 0.00441979 | 0.04370685 | 0.0341177  | 2 |
| Lakatan | Biological Process | GO:0048586 | regulation of long-day photoperiodism, flowering    | 2/142 | 25/34320  | 0.00479115 | 0.04507847 | 0.0351884  | 2 |
| Lakatan | Biological Process | GO:0009058 | biosynthetic process                                | 4/142 | 164/34320 | 0.00489616 | 0.04507847 | 0.0351884  | 4 |
| Lakatan | Molecular Function | GO:0051082 | unfolded protein binding                            | 7/142 | 162/34320 | 5.34E-06   | 0.00040366 | 0.0003151  | 7 |
| Lakatan | Molecular Function | GO:0031072 | heat shock protein binding                          | 3/142 | 48/34320  | 0.00104654 | 0.01714831 | 0.01338603 | 3 |
| Lakatan | Molecular Function | GO:0015301 | anion:anion antiporter activity                     | 2/142 | 12/34320  | 0.00109184 | 0.01714831 | 0.01338603 | 2 |
| Lakatan | Molecular Function | GO:0046914 | transition metal ion binding                        | 2/142 | 12/34320  | 0.00109184 | 0.01714831 | 0.01338603 | 2 |

**Comparative RNA-seq analysis of resistant and susceptible banana genotypes reveals molecular mechanisms in response to *Banana bunchy top virus* (BBTV) infection**

*Darlon V. Lantican, Jen Daine L. Nocum, Anand Noel C. Manohar, Jay-Vee S. Mendoza, Roanne R. Gardoce, Grace C. Lachica, Lavernee S. Gueco and Fe M. Dela Cueva*

Supplementary Table S3. List of enriched ( $p_{adj} < 0.075$ ) gene ontology terms in response of *wild M. balbisiana* and Lakatan to BBTV inoculation with mock-inoculated samples as baseline control.

|         |                    |            |                                                       |       |           |            |            |            |   |
|---------|--------------------|------------|-------------------------------------------------------|-------|-----------|------------|------------|------------|---|
| Lakatan | Molecular Function | GO:0033926 | glycopeptide alpha-N-acetylgalactosaminidase activity | 2/142 | 16/34320  | 0.00196373 | 0.0238326  | 0.01860381 | 2 |
| Lakatan | Molecular Function | GO:0070063 | RNA polymerase binding                                | 2/142 | 17/34320  | 0.00221954 | 0.02469239 | 0.01927496 | 2 |
| Lakatan | Molecular Function | GO:0051787 | misfolded protein binding                             | 2/142 | 24/34320  | 0.00441979 | 0.04370685 | 0.0341177  | 2 |
| Lakatan | Cellular Component | GO:0009570 | chloroplast stroma                                    | 6/142 | 271/34320 | 0.00095809 | 0.01714831 | 0.01338603 | 6 |
