# Supplementary material for: Comparative RNA-seq analysis of resistant and susceptible banana genotypes reveals molecular mechanisms in response to banana bunchy top virus (BBTV) infection
Source: PubMed Central journal article supplement (PMC10618458; doi:10.1038/s41598-023-45937-z), 2023-10-31
Supplement: 41598_2023_45937_MOESM4_ESM.pdf [file 41598_2023_45937_MOESM4_ESM.pdf]

**Comparative RNA-seq analysis of resistant and susceptible banana genotypes reveals molecular mechanisms in response to *Banana bunchy top virus* (BBTV) infection**

Darlon V. Lantican, Jen Daine L. Nocum, Anand Noel C. Manohar, Jay-Vee S. Mendoza, Roanne R. Gardoce, Grace C. Lachica, Lavernee S. Gueco and Fe M. Dela Cueva

Supplementary Table S4. Validation of differentially expressed genes with RT-qPCR and concordance to RNA-seq analysis.

| GENE ID               | GENE FUNCTION                                        | Forward Sequence        | Reverse Sequence        | RNA-Seq fold change | qPCR validation fold change | Concordant? (yes/no) |
|-----------------------|------------------------------------------------------|-------------------------|-------------------------|---------------------|-----------------------------|----------------------|
| Ma07_g10990           | <i>Adagio-like protein</i>                           | TCGAGAACGCCACCGGATAC    | AGCGGAGTGCCATCCTTCTA    | 5.302083346         | 30.31                       | yes                  |
| Ma06_g31610           | <i>Probable zinc metalloprotease EGY1</i>            | ACGAGGACCTGAACTCGGA     | TCCAAGCAGTTCCAGAAGCT    | 1.661500848         | 4.52                        | yes                  |
| Ma10_g05760           | <i>Nematode resistance protein-like HSPRO2</i>       | AGACTTCTGGCAGACCGAT     | AACGCTTGTCAGTGCCACT     | -2.854365873        | 2.107297177                 | no                   |
| Ma07_g23140           | <i>protein detoxification</i>                        | CTGAGGTTGCCATAGATGC     | CCTGCTGCTGACAAGAAAC     | -2.973160419        | 0.715247784                 | yes                  |
| Ma07_g26720           | <i>leucine rich repeat protein kinase VI</i>         | GCTTGAAGCTGCTTGTGAGG    | TCGGTAGATGTGATGGTGGTCG  | -2.40301635         | 4.729922787                 | no                   |
| Ma06_g30390           | <i>light regulated protein</i>                       | ATCGCGCCCAGGTCATCCAA    | ACGCCTCTCCACCAACTACA    | 3.446473912         | 3.628448845                 | yes                  |
| Ma03_g28040           | <i>chitinase</i>                                     | GCAGACCTCTCATGAAACC     | CTATAGCTTTCCAGCTTGG     | -3.731093357        | 0.876714068                 | yes                  |
| Ma08_g29650           | <i>Glucuronoxylan 4-O-methyltransferase</i>          | CCATCGTCCACTACACCACC    | GCCGAAGACCAGGAAGTTGC    | 3.722648648         | 14.28070438                 | yes                  |
| Ma11_g13780           | <i>BTB domain-containing protein</i>                 | CATCCTCCAATCCCTCCAAG    | CTCAGCTCCGTGTATACTTTC   | 2.36212275          | 4.16334547                  | yes                  |
| Ma02_g14310           | <i>EDR2_C domain-containing protein</i>              | CGTCCTCAGCATGATTTTC     | CAGCTTCAGCCTGTCAAG      | -3.194588833        | 1.791539176                 | no                   |
| Ma08_g06150           | <i>alkaline/neutral invertase</i>                    | CTAGTCACTGATGGCTCTTGC   | CAGTCTGTTATTGATAGCACGC  | 3.896274205         | 3.115384629                 | yes                  |
| Ma11_g20430           | <i>RuBisCO</i>                                       | CAATGCTGTCGGTGTTAC      | GCACGAGCAATAGTTACC      | 1.618934505         | 5.879492288                 | yes                  |
| Ma11_g09120           | <i>Eukaryotic translation initiation factor 5A-5</i> | GGTACATCGTCATCAAGAACAG  | GAAGATGGCACAATATCCTCAAG | 2.609649947         | 2.190776629                 | yes                  |
| Ma06_g32730           | <i>J domain-containing protein</i>                   | GAAACCCAATGAGAACAGCCAAG | CGATGAAGTCCAGCAATCTTG   | 2.933901567         | 2.024284925                 | yes                  |
| Ma03_g29390           | <i>HATPase C domain-containing protein</i>           | CCTGGAGATACGGATCAAGC    | GAACCTTGACGTACCACTCTG   | 3.268812451         | 6.549655028                 | yes                  |
| Ma03_g29391           | <i>APETALA-like 2</i>                                | CAATGGAAGGGAGGCAGTC     | GGACTATGAACATCAGGTTG    | -1.884064013        | 4.071357462                 | no                   |
| internal control gene | <i>L2</i>                                            | AGGGTTCATAGCCACACCAC    | CCGAACTGAGAAGCCCCTAC    |                     |                             |                      |

**Comparative RNA-seq analysis of resistant and susceptible banana genotypes reveals molecular mechanisms in response to *Banana bunchy top virus* (BBTV) infection**

*Darlon V. Lantican, Jen Daine L. Nocum, Anand Noel C. Manohar, Jay-Vee S. Mendoza, Roanne R. Gardoce, Grace C. Lachica, Lavernee S. Gueco and Fe M. Dela Cueva*

Supplementary Table S4. Validation of differentially expressed genes with RT-qPCR and concordance to RNA-seq analysis.
